# Supplementary material for: Moss kill dates and modeled summer temperature track episodic snowline lowering and ice cap expansion in Arctic Canada through the Common Era
Source: Copernicus journal article supplement (doi:10.5194/cp-19-2341-2023), 2023-11-15
Supplement: Supplementary file 1 [file cp-19-2341-2023-supplement.zip]

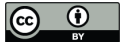

*Supplement of*

**Moss kill dates and modeled summer temperature track episodic snowline lowering and ice cap expansion in Arctic Canada through the Common Era**

**Gifford H. Miller et al.**

*Correspondence to:* Gifford H. Miller ([gmiller@colorado.edu](mailto:gmill@colorado.edu))

- [cp-19-2341-2023-supplement-title-page.pdf](#)
- [Miller\\_CommonEra\\_DateList.xlsx](#)
- [Supplemental figures.pdf](#)

The copyright of individual parts of the supplement might differ from the article licence.
