# Supplementary material for: Moss kill dates and modeled summer temperature track episodic snowline lowering and ice cap expansion in Arctic Canada through the Common Era
Source: Copernicus journal article supplement (doi:10.5194/cp-19-2341-2023), 2023-11-15
Supplement: Supplementary file 2 [file cp-19-2341-2023-supplement.zip]

Archive with 3 entries (3 files):
- cp-19-2341-2023-supplement-title-page.pdf
- Supplemental figures.pdf
- Miller_CommonEra_DateList.xlsx
